# Supplementary material for: Technical adequacy of bisulfite sequencing and pyrosequencing for detection of mitochondrial DNA methylation: Sources and avoidance of false-positive detection
Source: PubMed Central journal article supplement (PMC5805350; doi:10.1371/journal.pone.0192722), 2018-02-08
Supplement: pone.0192722.s012.pdf [file pone.0192722.s012.pdf]

|  |  |  |  |  |  |  |  |  |       |    |    |    |       |       |  |       |  |        |       |  |  |
|--|--|--|--|--|--|--|--|--|-------|----|----|----|-------|-------|--|-------|--|--------|-------|--|--|
|  |  |  |  |  |  |  |  |  | 22483 | 7  | 55 | 3  | 10157 | 10222 |  | 0.539 |  | 99.461 | 0.098 |  |  |
|  |  |  |  |  |  |  |  |  | 43713 | 7  | 56 | 0  | 8998  | 9061  |  | 0.619 |  | 99.381 | 0.077 |  |  |
|  |  |  |  |  |  |  |  |  | 10226 | 3  | 26 | 1  | 5666  | 5696  |  | 0.457 |  | 99.543 | 0.070 |  |  |
|  |  |  |  |  |  |  |  |  | 2606  | 6  | 47 | 0  | 9014  | 9067  |  | 0.519 |  | 99.481 | 0.066 |  |  |
|  |  |  |  |  |  |  |  |  | 2408  | 8  | 61 | 1  | 11035 | 11105 |  | 0.550 |  | 99.450 | 0.081 |  |  |
|  |  |  |  |  |  |  |  |  | 13204 | 4  | 33 | 2  | 6549  | 6588  |  | 0.501 |  | 99.499 | 0.091 |  |  |
|  |  |  |  |  |  |  |  |  | 30844 | 3  | 48 | 2  | 7847  | 7900  |  | 0.608 |  | 99.392 | 0.063 |  |  |
|  |  |  |  |  |  |  |  |  | 16022 | 0  | 42 | 1  | 6526  | 6569  |  | 0.639 |  | 99.361 | 0.015 |  |  |
|  |  |  |  |  |  |  |  |  | 22221 | 4  | 43 | 1  | 7590  | 7638  |  | 0.563 |  | 99.437 | 0.065 |  |  |
|  |  |  |  |  |  |  |  |  | 44997 | 4  | 46 | 2  | 6522  | 6574  |  | 0.700 |  | 99.300 | 0.091 |  |  |
|  |  |  |  |  |  |  |  |  | 9797  | 3  | 39 | 1  | 7812  | 7855  |  | 0.497 |  | 99.503 | 0.051 |  |  |
|  |  |  |  |  |  |  |  |  | 16674 | 5  | 46 | 2  | 7127  | 7180  |  | 0.641 |  | 99.359 | 0.097 |  |  |
|  |  |  |  |  |  |  |  |  | 19141 | 3  | 49 | 0  | 7436  | 7488  |  | 0.655 |  | 99.345 | 0.040 |  |  |
|  |  |  |  |  |  |  |  |  | 46440 | 6  | 65 | 1  | 9755  | 9827  |  | 0.662 |  | 99.338 | 0.071 |  |  |
|  |  |  |  |  |  |  |  |  | 44129 | 9  | 66 | 0  | 9882  | 9957  |  | 0.663 |  | 99.337 | 0.090 |  |  |
|  |  |  |  |  |  |  |  |  | 13974 | 5  | 27 | 3  | 6396  | 6431  |  | 0.420 |  | 99.580 | 0.124 |  |  |
|  |  |  |  |  |  |  |  |  | 19114 | 6  | 39 | 0  | 7113  | 7158  |  | 0.545 |  | 99.455 | 0.084 |  |  |
|  |  |  |  |  |  |  |  |  | 13337 | 4  | 37 | 0  | 7004  | 7045  |  | 0.525 |  | 99.475 | 0.057 |  |  |
|  |  |  |  |  |  |  |  |  | 39499 | 7  | 40 | 4  | 7362  | 7413  |  | 0.540 |  | 99.460 | 0.148 |  |  |
|  |  |  |  |  |  |  |  |  | 36488 | 2  | 43 | 0  | 8343  | 8388  |  | 0.513 |  | 99.487 | 0.024 |  |  |
|  |  |  |  |  |  |  |  |  | 7492  | 0  | 30 | 1  | 5636  | 5667  |  | 0.529 |  | 99.471 | 0.018 |  |  |
|  |  |  |  |  |  |  |  |  | 6622  | 3  | 50 | 2  | 7980  | 8035  |  | 0.623 |  | 99.377 | 0.062 |  |  |
|  |  |  |  |  |  |  |  |  | 17379 | 2  | 28 | 1  | 6014  | 6045  |  | 0.463 |  | 99.537 | 0.050 |  |  |
|  |  |  |  |  |  |  |  |  | 38216 | 5  | 37 | 4  | 7653  | 7699  |  | 0.481 |  | 99.519 | 0.117 |  |  |
|  |  |  |  |  |  |  |  |  | 26820 | 1  | 35 | 2  | 7947  | 7985  |  | 0.438 |  | 99.562 | 0.038 |  |  |
|  |  |  |  |  |  |  |  |  | 32871 | 5  | 37 | 1  | 6774  | 6817  |  | 0.543 |  | 99.457 | 0.088 |  |  |
|  |  |  |  |  |  |  |  |  | 7139  | 2  | 29 | 0  | 6349  | 6380  |  | 0.455 |  | 99.545 | 0.031 |  |  |
|  |  |  |  |  |  |  |  |  | 7685  | 1  | 41 | 1  | 6538  | 6581  |  | 0.623 |  | 99.377 | 0.030 |  |  |
|  |  |  |  |  |  |  |  |  | 35787 | 5  | 46 | 6  | 8145  | 8202  |  | 0.562 |  | 99.438 | 0.134 |  |  |
|  |  |  |  |  |  |  |  |  | 3780  | 3  | 33 | 1  | 6657  | 6694  |  | 0.493 |  | 99.507 | 0.060 |  |  |
|  |  |  |  |  |  |  |  |  | 9644  | 8  | 40 | 0  | 7236  | 7284  |  | 0.550 |  | 99.450 | 0.110 |  |  |
|  |  |  |  |  |  |  |  |  | 39662 | 4  | 58 | 2  | 8238  | 8302  |  | 0.699 |  | 99.301 | 0.072 |  |  |
|  |  |  |  |  |  |  |  |  | 23630 | 8  | 49 | 0  | 9223  | 9280  |  | 0.528 |  | 99.472 | 0.086 |  |  |
|  |  |  |  |  |  |  |  |  | 19416 | 5  | 53 | 2  | 9091  | 9151  |  | 0.580 |  | 99.420 | 0.076 |  |  |
|  |  |  |  |  |  |  |  |  | 27780 | 5  | 58 | 1  | 8522  | 8586  |  | 0.676 |  | 99.324 | 0.070 |  |  |
|  |  |  |  |  |  |  |  |  | 13197 | 2  | 48 | 1  | 6587  | 6638  |  | 0.723 |  | 99.277 | 0.045 |  |  |
|  |  |  |  |  |  |  |  |  | 14507 | 0  | 21 | 3  | 5412  | 5436  |  | 0.387 |  | 99.613 | 0.055 |  |  |
|  |  |  |  |  |  |  |  |  | 44906 | 3  | 30 | 3  | 7019  | 7055  |  | 0.426 |  | 99.574 | 0.085 |  |  |
|  |  |  |  |  |  |  |  |  | 14465 | 3  | 19 | 1  | 5037  | 5060  |  | 0.376 |  | 99.624 | 0.079 |  |  |
|  |  |  |  |  |  |  |  |  | 11302 | 2  | 34 | 0  | 5728  | 5764  |  | 0.590 |  | 99.410 | 0.035 |  |  |
|  |  |  |  |  |  |  |  |  | 43147 | 10 | 73 | 1  | 12483 | 12567 |  | 0.581 |  | 99.419 | 0.088 |  |  |
|  |  |  |  |  |  |  |  |  | 4010  | 4  | 47 | 1  | 5448  | 5500  |  | 0.855 |  | 99.145 | 0.091 |  |  |
|  |  |  |  |  |  |  |  |  | 42418 | 7  | 74 | 2  | 10535 | 10618 |  | 0.698 |  | 99.302 | 0.085 |  |  |
|  |  |  |  |  |  |  |  |  | 3573  | 5  | 39 | 1  | 7580  | 7625  |  | 0.512 |  | 99.488 | 0.079 |  |  |
|  |  |  |  |  |  |  |  |  | 31890 | 2  | 27 | 10 | 6710  | 6749  |  | 0.401 |  | 99.599 | 0.178 |  |  |
|  |  |  |  |  |  |  |  |  | 46171 | 5  | 60 | 1  | 8878  | 8944  |  | 0.671 |  | 99.329 | 0.067 |  |  |
|  |  |  |  |  |  |  |  |  | 1696  | 7  | 43 | 0  | 8028  | 8078  |  | 0.533 |  | 99.467 | 0.087 |  |  |
|  |  |  |  |  |  |  |  |  | 47046 | 9  | 76 | 4  | 10721 | 10810 |  | 0.704 |  | 99.296 | 0.120 |  |  |
|  |  |  |  |  |  |  |  |  | 31438 | 2  | 35 | 0  | 6516  | 6553  |  | 0.534 |  | 99.466 | 0.031 |  |  |
|  |  |  |  |  |  |  |  |  | 46878 | 6  | 50 | 3  | 9371  | 9430  |  | 0.531 |  | 99.469 | 0.095 |  |  |
|  |  |  |  |  |  |  |  |  | 3505  | 5  | 31 | 1  | 6219  | 6256  |  | 0.496 |  | 99.504 | 0.096 |  |  |
|  |  |  |  |  |  |  |  |  | 26286 | 8  | 51 | 3  | 8742  | 8804  |  | 0.580 |  | 99.420 | 0.125 |  |  |
|  |  |  |  |  |  |  |  |  | 36180 | 11 | 65 | 3  | 11311 | 11390 |  | 0.571 |  | 99.429 | 0.123 |  |  |
|  |  |  |  |  |  |  |  |  | 33760 | 10 | 40 | 1  | 9449  | 9500  |  | 0.422 |  | 99.578 | 0.116 |  |  |
|  |  |  |  |  |  |  |  |  | 31890 | 2  | 27 | 10 | 6710  | 6749  |  | 0.401 |  | 99.599 | 0.178 |  |  |
|  |  |  |  |  |  |  |  |  | 26531 | 7  | 60 | 0  | 8891  | 8958  |  | 0.670 |  | 99.330 | 0.078 |  |  |
